# Supplementary material for: Occupational Risks and Pregnancy and Infant Health Outcomes in Florida Farmworkers
Source: PubMed Central journal article supplement (PMC4143835; doi:10.3390/ijerph110807820), 2014-08-06
Supplement: ijerph-11-07820-s001.pdf [file ijerph-11-07820-s001.pdf]

|                          |                          |                 |
|--------------------------|--------------------------|-----------------|
| A. Participante #: _____ | B. Entrevistadora: _____ | C. Fecha: _____ |
|--------------------------|--------------------------|-----------------|

**PARA SER COMPLETADA POR LA ENTREVISTADORA:**

D. Por favor indique la apariencia racial del entrevistado:

- 1 Negro
- 2 Blanco
- 3 Más de una raza
- 99 No sabe

**Encuesta sobre el Embarazo en el Trabajo**

Voy a hacerle algunas preguntas sobre su experiencia como mujer en edad reproductiva que trabaja en la hojita/ la guardería. La encuesta nos debe tomar unos \_\_\_\_\_ minutos. Vamos a comenzar con algunas preguntas básicas acerca de usted y de donde viene

**SECCION A. DEMOGRAFICA**

1. ¿Qué edad tiene? \_\_\_\_ Años

2. ¿En qué país nació?

- 1 Estados Unidos
- 2 México
- 3 Haití
- 4 Otro, **ESPECIFIQUE** \_\_\_\_\_

3. ¿En qué condado está actualmente viviendo? \_\_\_\_\_

4. ¿Cuál es su estado civil?

- 1 Casada
- 2 Unión Libre/Viviendo con su pareja sin estar casados
- 3 Soltera
- 4 Divorciada
- 5 Viuda

5. ¿Qué idioma habla originalmente? \_\_\_\_\_

6. ¿Cuántos años de escuela terminó en su país de origen? \_\_\_\_\_

7. ¿Cuántos años de escuela terminó en los Estados Unidos? \_\_\_\_\_

8. ¿Se considera usted Hispana/Latina?

- 1 Si
- 2 No
- 77 SE NIEGA A CONTESTAR
- 99 NO SABE

9. ¿Está actualmente embarazada?

- 1 Si
- 2 No
- 77 SE NIEGA A CONTESTAR
- 99 NO SABE

**SECCION B. PRACTICAS LABORALES**

Las siguientes preguntas son sobre el tipo de trabajo que hace y las tareas que este trabajo implica.

10. ¿Esta actualmente empleada?

- 1 No
- 2 Si, tiempo parcial [menos de 35 horas a la semana]
- 3 Si, tiempo completo [mas de 35 horas a la semana]
- 77 SE NIEGA A CONTESTAR
- 99 NO SABE

11. En todo lo que va de su vida, ¿cuánto tiempo tiene trabajando en las norserias/con la hojita?\_\_\_\_\_

12. Además de su trabajo en las norserias/con la hojita ¿ha hecho algun otro tipo de trabajo en la agricultura?

- 1 Si
- 2 No
- 77 SE NIEGA A CONTESTAR
- 99 NO SABE

13. En una semana típica, ¿cuál de las siguientes tareas hace en su trabajo?

|                                                               | 1 Frecuentemente         | 2 Algunas veces          | 3 Nunca                  |
|---------------------------------------------------------------|--------------------------|--------------------------|--------------------------|
| 13A. Plantando (poniendo retoños en macetas - Poteando)       | <input type="checkbox"/> | <input type="checkbox"/> | <input type="checkbox"/> |
| 13B. Cortando o podando                                       | <input type="checkbox"/> | <input type="checkbox"/> | <input type="checkbox"/> |
| 13C. Moviendo plantas o arboles                               | <input type="checkbox"/> | <input type="checkbox"/> | <input type="checkbox"/> |
| 13D. Empacando y poniendo ordenes                             | <input type="checkbox"/> | <input type="checkbox"/> | <input type="checkbox"/> |
| 13E. Desempacando retoños                                     | <input type="checkbox"/> | <input type="checkbox"/> | <input type="checkbox"/> |
| 13F. Lavando, limpiando plantas y/o arboles                   | <input type="checkbox"/> | <input type="checkbox"/> | <input type="checkbox"/> |
| 13G. Deshierbando (limpiando monte)                           | <input type="checkbox"/> | <input type="checkbox"/> | <input type="checkbox"/> |
| 13H. Clasificando plantas                                     | <input type="checkbox"/> | <input type="checkbox"/> | <input type="checkbox"/> |
| 13I. Transportando                                            | <input type="checkbox"/> | <input type="checkbox"/> | <input type="checkbox"/> |
| 13J. Cargando a mano                                          | <input type="checkbox"/> | <input type="checkbox"/> | <input type="checkbox"/> |
| 13K. Mesclando/rociando/sprayando pesticidas u otros químicos | <input type="checkbox"/> | <input type="checkbox"/> | <input type="checkbox"/> |
| 13L. Limpiando el área de trabajo                             | <input type="checkbox"/> | <input type="checkbox"/> | <input type="checkbox"/> |
| 13M. Operando el montacargas (forklift) u otra maquinaria     | <input type="checkbox"/> | <input type="checkbox"/> | <input type="checkbox"/> |
| 13N. Supervisando otros trabajadores                          | <input type="checkbox"/> | <input type="checkbox"/> | <input type="checkbox"/> |
| 13O. Otra cosa (Por favor especifique)                        |                          |                          |                          |

14. En la última semana, cuando estuvo en el trabajo, cuanto tiempo estuvo haciendo lo siguiente:

|                                               | 1 Frecuentemente         | 2 Algunas veces          | 3 Nunca                  |
|-----------------------------------------------|--------------------------|--------------------------|--------------------------|
| 14A. Sentada                                  | <input type="checkbox"/> | <input type="checkbox"/> | <input type="checkbox"/> |
| 14B. Parada                                   | <input type="checkbox"/> | <input type="checkbox"/> | <input type="checkbox"/> |
| 14C. Caminando                                | <input type="checkbox"/> | <input type="checkbox"/> | <input type="checkbox"/> |
| 14D. Cargando                                 | <input type="checkbox"/> | <input type="checkbox"/> | <input type="checkbox"/> |
| 14E. Agachada                                 | <input type="checkbox"/> | <input type="checkbox"/> | <input type="checkbox"/> |
| 14F. Cortando/Usando herramientas de mano     | <input type="checkbox"/> | <input type="checkbox"/> | <input type="checkbox"/> |
| 14G. Arrodillada                              | <input type="checkbox"/> | <input type="checkbox"/> | <input type="checkbox"/> |
| 14H. En un lugar muy caliente o bajo el sol   | <input type="checkbox"/> | <input type="checkbox"/> | <input type="checkbox"/> |
| 14I. Retorciéndose                            | <input type="checkbox"/> | <input type="checkbox"/> | <input type="checkbox"/> |
| 14J. Alcanzando cosas por encima de su cabeza | <input type="checkbox"/> | <input type="checkbox"/> | <input type="checkbox"/> |
| 14K. En cuclillas                             | <input type="checkbox"/> | <input type="checkbox"/> | <input type="checkbox"/> |

15. Durante el verano, con que frecuencia siente \_\_\_\_\_ (SINTOMA) mientras trabaja:

|                                       | 1 Frecuentemente         | 2 Algunas veces          | 3 Nunca                  |
|---------------------------------------|--------------------------|--------------------------|--------------------------|
| 15A. Fatiga                           | <input type="checkbox"/> | <input type="checkbox"/> | <input type="checkbox"/> |
| 15B. Debilidad                        | <input type="checkbox"/> | <input type="checkbox"/> | <input type="checkbox"/> |
| 15C. Perdida de coordinación          | <input type="checkbox"/> | <input type="checkbox"/> | <input type="checkbox"/> |
| 15D. Mareos                           | <input type="checkbox"/> | <input type="checkbox"/> | <input type="checkbox"/> |
| 15E. Nausea                           | <input type="checkbox"/> | <input type="checkbox"/> | <input type="checkbox"/> |
| 15F. Calambres musculares repentinos  | <input type="checkbox"/> | <input type="checkbox"/> | <input type="checkbox"/> |
| 15G. Agotamiento por calor (bochorno) | <input type="checkbox"/> | <input type="checkbox"/> | <input type="checkbox"/> |
| 15H. Desmayos                         | <input type="checkbox"/> | <input type="checkbox"/> | <input type="checkbox"/> |

### **SECTION C. HIGIENE EN EL TRABAJO**

Las siguientes preguntas son sobre su acceso a facilidades sanitarias en su lugar de trabajo

16A. En su lugar de trabajo ¿Tiene un lugar donde pueda lavar sus manos?

- 1 Siempre
- 2 Algunas veces
- 3 Nunca
- 77 SE NIEGA A CONTESTAR
- 99 NO SABE

16B. **SI SIEMPRE O ALGUNAS VECES:** En su trabajo, donde se lava las manos ¿Cón que frecuencia hay jabón y toallas de papel?

- 1 Siempre
- 2 Algunas veces
- 3 Nunca
- 77 SE NIEGA A CONTESTAR
- 99 NO SABE

17. Cuando esta trabajando en la nurseria o con la hojita ¿Con que frecuencia se lava las manos antes de comer?

- 1 Siempre
- 2 Algunas veces
- 3 Nunca
- 77 SE NIEGA A CONTESTAR
- 99 NO SABE

18. En su lugar de trabajo ¿tiene agua potable (que este lo suficientemente limpia como para beber)?

- 1 Siempre
- 2 Algunas veces
- 3 Nunca
- 77 SE NIEGA A CONTESTAR
- 99 NO SABE

19A. ¿Con que frecuencia su trabajo tiene vasos desechables o algo con que beber?

- 1 Siempre
- 2 Algunas veces
- 3 Nunca
- 77 SE NIEGA A CONTESTAR
- 99 NO SABE

19B. **SI SIEMPRE O ALGUNAS VECES:** Si no le dan vasos desechables, con que frecuencia usa cualquier recipiente disponible para beber agua?

- 1 Siempre
- 2 Algunas veces
- 3 Nunca
- 77 SE NIEGA A CONTESTAR
- 99 NO SABE

20A. En su lugar de trabajo, ¿puede tomar agua a la hora que usted quiera?

- 1 Siempre
- 2 Algunas veces
- 3 Nunca
- 77 SE NIEGA A CONTESTAR
- 99 NO SABE

**SI ALGUNAS VECES O NUNCA:** Cuando no puede tomar agua a la hora que usted quisiera ¿Con que frecuencia se debe a una de las siguientes razones?

|                                                                               | 1 Frecuentemente         | 2 Algunas veces          | 3 Nunca                  |
|-------------------------------------------------------------------------------|--------------------------|--------------------------|--------------------------|
| 20B. Estoy preocupada que mi supervisor me este observando y se enoje conmigo | <input type="checkbox"/> | <input type="checkbox"/> | <input type="checkbox"/> |
| 20C. No quiero tomar tiempo de mi trabajo                                     | <input type="checkbox"/> | <input type="checkbox"/> | <input type="checkbox"/> |
| 20D. No hay agua de beber                                                     | <input type="checkbox"/> | <input type="checkbox"/> | <input type="checkbox"/> |

21A. ¿Normalmente hay baños en su lugar de trabajo?

- 1 Si, hay baño
- 2 Si, hay baños moviles/letrinas (portable toilets)
- 3 No

21B. SI **NO**: ¿A donde va a hacer del baño?

---

---

---

- 77 SE NIEGA A CONTESTAR
- 99 NO SABE

22A. En su lugar de trabajo ¿Puede ir al baño en el momento que usted quiere?

- 1 Siempre
- 2 Algunas veces
- 3 Nunca
- 77 SE NIEGA A CONTESTAR
- 99 NO SABE

**SI ALGUNAS VECES O NUNCA:** Cuando no puede ir al baño a la hora que usted quisiera ¿Con que frecuencia se debe a una de las siguientes razones?

|                                                                               | 1 Frecuentemente         | 2 Algunas veces          | 3 Nunca                  |
|-------------------------------------------------------------------------------|--------------------------|--------------------------|--------------------------|
| 22B. Estoy preocupada que mi supervisor me este observando y se enoje conmigo | <input type="checkbox"/> | <input type="checkbox"/> | <input type="checkbox"/> |
| 22C No quiero tomar tiempo de mi trabajo                                      | <input type="checkbox"/> | <input type="checkbox"/> | <input type="checkbox"/> |
| 22D. Los baños no estan limpios o les falta mantenimiento                     | <input type="checkbox"/> | <input type="checkbox"/> | <input type="checkbox"/> |

23. En su lugar de trabajo ¿le dan equipo de protección (por ejemplo: guantes, overoles, mascarillas, lentes)?

- 1 Siempre (PASE A LA PREGUNTA 25)
- 2 Algunas veces
- 3 Nunca
- 77 SE NIEGA A CONTESTAR
- 99 NO SABE

24. ¿Usted tiene que traer su propio equipo de protección (por ejemplo: guantes, overoles, mascarillas, lentes)?

- 1 Siempre
- 2 Algunas veces
- 3 Nunca
- 77 SE NIEGA A CONTESTAR
- 99 NO SABE

25. ¿En que momento se cambia de ropa después de haber salido del trabajo?

- 1 Inmediatamente
- 2 En los primeros 30 minutos de salir
- 3 Mas tarde de 30 minutos de haber salido
- 77 SE NIEGA A CONTESTAR
- 99 NO SABE

26. . ¿En que momento se baña cuando llega a casa después del trabajo?

- 1 Inmediatamente
- 2 En los primeros 30 minutos de salir
- 3 Mas tarde de 30 minutos de haber salido
- 77 SE NIEGA A CONTESTAR
- 99 NO SABE

#### **SECCION D. CREENCIAS DE SALUD**

Las siguientes preguntas son sobre sus sentimientos y creencias de los pesticidas

27. ¿Con que frecuencia piensa que tiene contacto con los pesticidas mientras trabaja en la nurseria/con la hojita?

- 1 Todos los días
- 2 Ocasionalmente
- 3 Nunca
- 77 SE NIEGA A CONTESTAR
- 99 NO SABE

28. En el mes pasado ¿Con que frecuencia le preocuparon los efectos de los pesticidas a su salud?

- 1 Todos los días
- 2 Ocasionalmente
- 3 Nunca
- 77 SE NIEGA A CONTESTAR
- 99 NO SABE

|                                                                                                                                                    |                                  |                                  |                                               |                                                     |
|----------------------------------------------------------------------------------------------------------------------------------------------------|----------------------------------|----------------------------------|-----------------------------------------------|-----------------------------------------------------|
| 29. ¿Usted cree que alguna vez ha estado enferma por haber trabajado en lugares donde se han usado pesticidas?                                     | <input type="checkbox"/><br>1 Si | <input type="checkbox"/><br>2 No | <input type="checkbox"/><br>3 No estoy segura | <input type="checkbox"/><br>77 Se niega a contestar |
| 30. ¿Usted cree que los pesticidas puedan afectar a las personas que trabajan en las norserias o en la hojita?                                     | <input type="checkbox"/><br>1 Si | <input type="checkbox"/><br>2 No | <input type="checkbox"/><br>3 No estoy segura | <input type="checkbox"/><br>77 Se niega a contestar |
| 31. ¿Usted cree que los pesticidas puedan afectar la salud de los niños en los vientres de las madres que trabajan en la nurseria/ o en la hojita? | <input type="checkbox"/><br>1 Si | <input type="checkbox"/><br>2 No | <input type="checkbox"/><br>3 No estoy segura | <input type="checkbox"/><br>77 Se niega a contestar |
| 32. ¿Usted cree que los pesticidas puedan afectar la salud de los niños que viven con padres que trabajan en la nurseria/ o en la hojita?          | <input type="checkbox"/><br>1 Si | <input type="checkbox"/><br>2 No | <input type="checkbox"/><br>3 No estoy segura | <input type="checkbox"/><br>77 Se niega a contestar |
| 33. ¿Usted cree que tendrá problemas de salud en futuro a causa de los pesticidas?                                                                 | <input type="checkbox"/><br>1 Si | <input type="checkbox"/><br>2 No | <input type="checkbox"/><br>3 No estoy segura | <input type="checkbox"/><br>77 Se niega a contestar |
| 34. ¿Usted cree que sus hijos estén sufriendo o sufriran de problemas de salud a causa de los pesticidas?                                          | <input type="checkbox"/><br>1 Si | <input type="checkbox"/><br>2 No | <input type="checkbox"/><br>3 No estoy segura | <input type="checkbox"/><br>77 Se niega a contestar |



**SECTION E. HISTORIA REPRODUCTIVA**

Ahora me gustaría preguntarle sobre las veces en las que ha estado embarazada.

35. ¿Cuántas veces ha estado embarazada? Por favor incluya a todos los niños vivos, abortos voluntarios e involuntarios (miscarriages), niños nacidos muertos, embarazos ectópicos, embarazos en los tubos de la matriz, y embarazos molares \_\_\_ \_\_ **embarazo(s)** [00 = Ninguno]

Ahora me gustaría preguntarle sobre cada uno de sus embarazos comenzando con su último embarazo.

|      |                                                                                                                                                                                                                                                                                                                                                                                                                                                                                              |                                                                                                  |
|------|----------------------------------------------------------------------------------------------------------------------------------------------------------------------------------------------------------------------------------------------------------------------------------------------------------------------------------------------------------------------------------------------------------------------------------------------------------------------------------------------|--------------------------------------------------------------------------------------------------|
| 36.  | <p>Dígame ¿Cuál fue el resultado de su embarazo <b>mas reciente?</b></p> <ol style="list-style-type: none"> <li>1. El niño nació vivo</li> <li>2. Miscarriage (perdida del embarazo en las primeras 20 semanas de gestación)</li> <li>3. Aborto</li> <li>4. El niño nació muerto (nacido después de 20 semanas de gestación)</li> <li>5. Embarazo Ectópico (embarazo en los tubos de la matriz)</li> <li>6. Embarazo Molar</li> <li>77. SE NIEGA A CONTESTAR</li> <li>99. NO SABE</li> </ol> |                                                                                                  |
| 37.  | <p>¿Cuántas semanas duro el embarazo?</p> <p><b>[USE MESES SI NO SABE CUANTAS SEMANAS]</b></p> <p><b>[SI NO SABE, PREGUNTE SI]:</b> ¿Fue un embarazo a término? 37-40 semanas, o 9 meses?</p> <p><b>[94=NO FUE A TERMINO]</b></p> <p><b>[95= A TERMINO]</b></p> <p><b>[99 = NO SABE]</b></p>                                                                                                                                                                                                 | <p style="text-align: center;">— —</p> <p style="text-align: center;"><b>MARQUE: SEM/MES</b></p> |
| 38A. | <p>¿Estuvo trabajando durante este embarazo?</p> <ol style="list-style-type: none"> <li>1 – SI, TRABAJO DURANTE TODO EL EMABRAZO <b>(PASE A LA PREGUNTA 39)</b></li> <li>2 – SI, PERO DEJO DE TRABAJAR ANTES QUE TERMINARA EL EMBARAZO</li> <li>3 – NO, NO TRABAJO EN NINGUN MOMENTO DE ESTE EMBARAZO <b>(PASE A LA PREGUNTA 41)</b></li> <li>77 – SE NIEGA A CONTESTAR</li> <li>99 – NO SABE</li> </ol>                                                                                     |                                                                                                  |
|      |                                                                                                                                                                                                                                                                                                                                                                                                                                                                                              |                                                                                                  |

|      |                                                                                                                                                                                                                                                                             |                                                                                                                                      |
|------|-----------------------------------------------------------------------------------------------------------------------------------------------------------------------------------------------------------------------------------------------------------------------------|--------------------------------------------------------------------------------------------------------------------------------------|
| 38B. | Si no trabajo durante todo el embarazo. ¿En que semana dejo de trabajar? <b>[USE MESES SI NO SABE CUANTAS SEMANAS]</b>                                                                                                                                                      | <p style="text-align: center;">— —</p> <p style="text-align: center;"><b>MARQUE: SEM/MES</b></p>                                     |
| 39.  | ¿Trabajo en la agricultura durante este embarazo?<br>1 – SI, EN UNA NURSERIA<br>2 – SI, CON LA HOJITA<br>3 – SI, EN AMBOS UNA NURSERIA Y LA HOJITA<br>4 – SI, EN OTRO TRABAJO AGRICOLA<br>5 – NO, NO TRABAJE EN LA AGRICULTURA<br>77 – SE NIEGA A CONTESTAR<br>99 – NO SABE | <p style="text-align: center;">—</p> <p style="text-align: center;">37B. Si 4, ¿que tipo?</p> <p>_____</p> <p>_____</p> <p>_____</p> |
| 40A. | ¿Le dijo a su supervisor que estaba embarazada?<br>1 – SI<br>2 – NUNCA LE DIJE PERO SE DIO CUENTA<br>3 – NO <b>(PASE A LA PREGUNTA 41)</b><br>4 –NO TRABAJE DURANTE ESTE EMBARAZO <b>(PASE A LA PREGUNTA 41)</b><br>77 – SE NIEGA A CONTESTAR<br>99 – NO SABE               |                                                                                                                                      |
| 40B. | <b>SI LE DIJO:</b> ¿En que momento le dijo que estaba embarazada?<br><b>[USE MESES SI NO SABE CUANTAS SEMANAS]</b><br><b>[99 = NO SABE]</b>                                                                                                                                 | <p style="text-align: center;">— —</p> <p style="text-align: center;"><b>MARQUE: SEM/MES</b></p>                                     |
| 41.  | ¿Fumo durante este embarazo?<br>1 – SI<br>2 – ALGUNAS VECES<br>3 – NO<br>77 – SE NIEGA A CONTESTAR<br>99 – NO SABE                                                                                                                                                          | <p style="text-align: center;">—</p>                                                                                                 |

|     |                                                                                                                            |                                                                                                                                                                                                                                                                                                                                                                                                                                                                                                                            |
|-----|----------------------------------------------------------------------------------------------------------------------------|----------------------------------------------------------------------------------------------------------------------------------------------------------------------------------------------------------------------------------------------------------------------------------------------------------------------------------------------------------------------------------------------------------------------------------------------------------------------------------------------------------------------------|
| 42. | ¿Tomo alcohol durante este embarazo?<br>1 – SI<br>2 – ALGUNAS VECES<br>3 – NO<br>77 – SE NIEGA A CONTESTAR<br>99 – NO SABE | —                                                                                                                                                                                                                                                                                                                                                                                                                                                                                                                          |
| 43. | ¿Recibió cuidado prenatal durante este embarazo?<br>1 – SI<br>2 – NO<br>77 – SE NIEGA A CONTESTAR<br>99 – NO SABE          | —                                                                                                                                                                                                                                                                                                                                                                                                                                                                                                                          |
| 44. | ¿Qué tipo de problemas tuvo para recibir atención prenatal durante este embarazo?<br><b>MARQUETODAS LAS QUE APLIQUEN</b>   | A. No consiguió hacer cita<br>B. No tenía dinero para recibir atención<br>C. Sin transportación<br>D. No tenía seguro médico<br>E. Sin Medicaid<br>F. Sin ayuda para cuidar a los otros hijos<br>G. Muy ocupada o con muchas otras preocupaciones para buscar cuidado prenatal<br>H. Tuvo que ocultar el embarazo<br>I. No existía atención médica en el area<br>J. Temerosa de perder días de trabajo y/o las consecuencias en su trabajo<br>K. Otra razón<br>Por favor especifique :<br>L. _____<br>M. _____<br>N. _____ |
|     |                                                                                                                            |                                                                                                                                                                                                                                                                                                                                                                                                                                                                                                                            |

|            |                                                                                                                                                                                                                                                                 |                                                                                                                                                                                                                          |
|------------|-----------------------------------------------------------------------------------------------------------------------------------------------------------------------------------------------------------------------------------------------------------------|--------------------------------------------------------------------------------------------------------------------------------------------------------------------------------------------------------------------------|
| 45.        | <p>¿En que semana de su embarazo recibió su primera atención prenatal?</p> <p><b>[USE MESES SI NO SABE CUANTAS SEMANAS]</b></p> <p><b>[99 = NO SABE]</b></p> <p><b>NO MARQUE NADA SI NO RECIBIO CUIDADO PRENATAL</b></p>                                        | <p>— —</p> <p><b>MARQUE: SEM/MES</b></p>                                                                                                                                                                                 |
| 46.        | <p>Durante su embarazo ¿Se sintió cómoda hablando con su medico y haciéndole preguntas?</p> <p>1 – MUY COMODA</p> <p>2 – MAS O MENOS COMODA</p> <p>3 – SE SINTIO INCOMODA</p> <p>77 – SE NIEGA A CONTESTAR</p> <p>99 – NO SABE</p>                              | <p>—</p>                                                                                                                                                                                                                 |
| 47.        | <p>Durante su embarazo, ¿Su médico le pregunto sobre el tipo de trabajo que estaba haciendo?</p> <p>1 – SI</p> <p>2 – NO <b>[PASE A LA PREGUNTA 51]</b></p> <p>77 – SE NIEGA A CONTESTAR</p> <p>99 – NO SABE</p>                                                | <p>—</p>                                                                                                                                                                                                                 |
| 48.        | <p>¿Recibió indicaciones de su médico u enfermera para que cambiara algo en el trabajo que hacia por el tiempo en que duraba este embarazo?</p> <p>1 – SI</p> <p>2 – NO <b>(PASE A LA PREGUNTA 51)</b></p> <p>77 – SE NIEGA A CONTESTAR</p> <p>99 – NO SABE</p> | <p>—</p>                                                                                                                                                                                                                 |
| 49<br>A-F. | <p><b>SI ASI FUE:</b> ¿Qué le pidió que cambiara?</p> <p><b>[MARQUE A LA DERECHA]</b></p>                                                                                                                                                                       | <p>A. Trabajar menos horas</p> <p>B. Tomar descansos con mayor frecuencia</p> <p>C. Estar más tiempo sentada que parada</p> <p>D. Otro tipo de recomendación, por favor especifique:</p> <p>E. _____</p> <p>F. _____</p> |
|            |                                                                                                                                                                                                                                                                 |                                                                                                                                                                                                                          |

|      |                                                                                                                                                                                                                                                                                                                         |                                                       |
|------|-------------------------------------------------------------------------------------------------------------------------------------------------------------------------------------------------------------------------------------------------------------------------------------------------------------------------|-------------------------------------------------------|
| 49G. | <p>Si le hicieron una recomendación ¿Pudo hacer los cambios en el trabajo para seguir trabajando?</p> <p>1 – SI</p> <p>2 – NO, TUVE QUE DEJAR DE TRABAJAR</p> <p>3 – NO, SEGUI TRABAJANDO DE LA MISMA FORMA, CONTRARIO A LAS INDICACIONES DEL MEDICO/ENFERMERA</p> <p>77 – SE NIEGA A CONTESTAR</p> <p>99 – NO SABE</p> | —                                                     |
| 50.  | <p>Durante el embarazo ¿se le diagnosticó con:</p> <p><b>[PREGUNTE POR CADA DIAGNOSTICO]</b></p> <p>1 – SI</p> <p>2 – NO</p> <p>77 – SE NIEGA A CONTESTAR</p> <p>99 – NO SABE</p>                                                                                                                                       |                                                       |
| 50A. | Alta presión arterial, pre eclampsia, toxemia, o eclampsia?                                                                                                                                                                                                                                                             | —                                                     |
| 50B. | Diabetes o alto nivel de azúcar en la sangre?                                                                                                                                                                                                                                                                           | —                                                     |
| 50C. | Parto prematuro o contracciones prematuras?                                                                                                                                                                                                                                                                             | —                                                     |
| 50D. | Alguna otra complicación en su embarazo? (Especifique por favor)                                                                                                                                                                                                                                                        | <p>50E. _____</p> <p>50F. _____</p> <p>50G. _____</p> |
|      |                                                                                                                                                                                                                                                                                                                         |                                                       |

|     |                                                                                                                                                                                                                                                                                                                |                                                                                                                                                                                                                                                                                                                                                                                                                                                                                                                                                                                                                                                     |
|-----|----------------------------------------------------------------------------------------------------------------------------------------------------------------------------------------------------------------------------------------------------------------------------------------------------------------|-----------------------------------------------------------------------------------------------------------------------------------------------------------------------------------------------------------------------------------------------------------------------------------------------------------------------------------------------------------------------------------------------------------------------------------------------------------------------------------------------------------------------------------------------------------------------------------------------------------------------------------------------------|
| 51. | <p>Durante este último embarazo ¿tuvo alguno de los siguientes problemas?</p> <p><b>(LEA Y MARQUE LA LISTA A LA DERECHA)</b></p> <p><b>MARQUE. N/A SI NINGUNO DE LOS PROBLEMAS FUERON REPORTADOS</b></p>                                                                                                       | <p>A. Dolor de cabeza</p> <p>B. Nausea/vomito</p> <p>C. Mareos/Desmayos</p> <p>D. Vista Borrosa/Nublada</p> <p>E. Hinchazón</p> <p>F. Se le entumieron las manos o las piernas</p> <p>G. Ronchas/Salpullido</p> <p>H. Ojos irritados</p> <p>I. Infección en las vías urinarias</p> <p>J. Incremento o decremento de los movimientos del niño a la hora del trabajo</p> <p>K. Mucha tos/dificultad para respirar</p> <p>L. Taquicardia/El corazón muy acelerado</p> <p>M. Garganta irritada</p> <p>N. Sangrado vaginal o pantis manchadas</p> <p>O. Constipación o diarrea</p> <p>P. Piernas temblorosas/caídas mientras trabajaba</p> <p>Q. N/A</p> |
| 52. | <p><b>[Si el participante no trabajo en la agricultura en este ultimo embarazo PASE A LA PREGUNTA 55]</b></p> <p>Nos podría mostrar donde tuvo dolor <b>mientras trabajaba</b> en la nurseria o la hojita estando embarazada.</p> <p><b>[COMPLETE BODY PAIN CHART Y MARQUE EN ESTA PAGINA AL TERMINAR]</b></p> | <p>___ Body chart completed</p> <p><b>MARQUE N/A si no aplica</b></p>                                                                                                                                                                                                                                                                                                                                                                                                                                                                                                                                                                               |
| 53. | <p>Nos podría mostrar donde tuvo ronchas/salpullido <b>cuando trabajaba</b> en la nurseria o la hojita estando embarazada.</p> <p><b>[ COMPLETE RASH CHART Y MARQUE EN ESTA PAGINA AL TERMINAR ]</b></p>                                                                                                       | <p>___ Rash chart completed</p> <p><b>MARQUE N/A si no aplica</b></p>                                                                                                                                                                                                                                                                                                                                                                                                                                                                                                                                                                               |
| 54. | <p>¿En que fecha nació su hijo(a) o termino este embarazo)?</p> <p><b>[00/00/13]= ACTUALMENTE EMBARAZADA</b></p> <p><b>[99/99/13]= NO SE ACUERDA</b></p>                                                                                                                                                       | <p>___/___/___</p> <p>MES/DIA/ANO</p>                                                                                                                                                                                                                                                                                                                                                                                                                                                                                                                                                                                                               |
|     |                                                                                                                                                                                                                                                                                                                |                                                                                                                                                                                                                                                                                                                                                                                                                                                                                                                                                                                                                                                     |

|     |                                                                                                                                                                                                                                                                                                                                                                                 |                                                                                                                                                                                    |
|-----|---------------------------------------------------------------------------------------------------------------------------------------------------------------------------------------------------------------------------------------------------------------------------------------------------------------------------------------------------------------------------------|------------------------------------------------------------------------------------------------------------------------------------------------------------------------------------|
| 55. | <p>¿En algún momento desde su nacimiento hasta el primer año de vida, el medico le dijo que el bebe tenía algún defecto de nacimiento o alguna otra enfermedad? (Pregunto incluso si el niño falleció)</p> <p>1 – SI<br/>2 – NO<br/>77 – SE NIEGA A CONTESTAR<br/>99 – NO SABE</p> <p><b>[SI ACTUALMENTE EMBARAZADA O NO RESULTO EN INFANTE VIVO PASE A LA PREGUNTA 63]</b></p> | <p>Si contesta afirmativamente, por favor especifique:</p> <p>—</p> <p><b>Si fue causa de muerte marque (D)</b></p> <p>55B. _____<br/>55C. _____<br/>55D. _____<br/>55E. _____</p> |
| 56. | <p><b>[CONTINUE SOLO SI EL EMBARAZO TERMINO EN HIJO VIVO]</b></p> <p>¿Este ultimo hijo fue un niño o una niña?</p> <p>NIÑO – 1<br/>NIÑA– 2</p>                                                                                                                                                                                                                                  | <p>—</p>                                                                                                                                                                           |
| 57. | <p>¿Cuál es el nombre de su niño(a)?</p>                                                                                                                                                                                                                                                                                                                                        | <p>_____</p>                                                                                                                                                                       |
| 58. | <p>¿Qué peso tenia _____ <b>[NOMBRE]</b> cuando nacio?</p> <p><b>[SI NO SABE]</b> ¿Sabe si _____ <b>[NOMBRE]</b> pesando menos de 5 lbs 8 oz? (2500g)</p> <p>MARQUE si 'NO SABE':</p> <p><b>9994:</b> &lt; 5 lbs, 8 oz o 2500 gramos<br/><b>9995:</b> &gt; 5 lbs, 8oz o 2500 gramos</p>                                                                                         | <p>__ lbs __ oz<br/>Or<br/>_____ kg</p>                                                                                                                                            |

|     |                                                                                                                                                                                                                                                                       |                                                                                              |
|-----|-----------------------------------------------------------------------------------------------------------------------------------------------------------------------------------------------------------------------------------------------------------------------|----------------------------------------------------------------------------------------------|
| 59. | ¿Le dio el pecho a _____ [NOMBRE]?<br>1 – SI<br>2 – NO ( <b>PASE A LA PREGUNTA 61</b> )<br>77 – SE NIEGA A CONTESTAR<br>99 – NO SABE                                                                                                                                  | —                                                                                            |
| 60. | ¿Cuántos meses tenía _____ [NOMBRE] cuando dejo de darle pecho?<br><b>[94 = ACTUALMENTE AMAMANTANDO ]</b><br><b>[95 = MENOS DE UN MES]</b><br><b>[77 = SE NIEGA A CONTESTAR]</b><br><b>[99 = NO SABE]</b>                                                             | — —<br>MESES                                                                                 |
| 61. | ¿Qué edad tenía _____ [NOMBRE] cuando usted regreso a trabajar?                                                                                                                                                                                                       | _____ <b>MARQUE: SEM/MES/AÑOS</b>                                                            |
| 62. | ¿Alguna vez han diagnosticado a _____ [NOMBRE] de alguna enfermedad incluyendo problemas respiratorios, asma, problemas psicológicos o de aprendizaje o cualquier otro problema crónico?<br>SI – 1 (ESPECIFIQUE)<br>NO – 2<br>SE NIEGA A CONTESTAR – 7<br>NO SABE – 9 | —<br>Si contesta afirmativamente, por favor especifique:<br>A. _____<br>B. _____<br>C. _____ |



| <b>HÁBITOS PATERNALES</b> |                                                                                                                                      |   |
|---------------------------|--------------------------------------------------------------------------------------------------------------------------------------|---|
| 63.                       | ¿Vivió con el papa del niño mientras duro su embarazo?<br>1 – SI<br>2 – NO<br>77 – SE NIEGA A CONTESTAR<br>99 – NO SABE              | — |
| 64.                       | ¿Durante este embarazo el padre de su hijo                                                                                           |   |
| 64A.                      | Trabajo en las norserias o en la hojita?<br>1 – SI<br>2 – NO<br>77 – SE NIEGA A CONTESTAR                      99 – NO SABE          | — |
| 64B.                      | Aplico pesticidas, espray en el trabajo (sprayo)?<br>1 – SI<br>2 – NO<br>77 – SE NIEGA A CONTESTAR                      99 – NO SABE | — |

En esta última sección voy a preguntarle por el resto de sus embarazos comenzando con el más reciente después del que le acabo de preguntar.

**(MENCIONE EL NOMBRE DEL ÚLTIMO HIJO SI ES POSIBLE)**

|     | EMBARAZO                                                                                                                                                                                                                                                                                                                                                                                                                  | 2 <sup>nd</sup> más reciente                                                        | 3 <sup>rd</sup> más reciente                                                        | 4 <sup>th</sup> más reciente                                                        | 5 <sup>th</sup> más reciente                                                        | 6 <sup>th</sup> más reciente                                                        |
|-----|---------------------------------------------------------------------------------------------------------------------------------------------------------------------------------------------------------------------------------------------------------------------------------------------------------------------------------------------------------------------------------------------------------------------------|-------------------------------------------------------------------------------------|-------------------------------------------------------------------------------------|-------------------------------------------------------------------------------------|-------------------------------------------------------------------------------------|-------------------------------------------------------------------------------------|
| 65. | <p>Díganos ¿Cual fue el resultado de sus anteriores embarazos comenzando con el penúltimo?</p> <p>1. Niño(a) viva</p> <p>2. Un aborto involuntario <b>con menos</b> de 20 semanas o 5 meses de embarazo (Miscarriage) .</p> <p>3. Aborto</p> <p>4. Nacido muerto (≥ 20 semanas o 5 meses de embarazo)</p> <p>5. Embarazo Ectopic (tubal)</p> <p>6. Embarazo Molar</p> <p>77 – SE NIEGA A CONTESTAR</p> <p>99. NO SABE</p> | —                                                                                   | —                                                                                   | —                                                                                   | —                                                                                   | —                                                                                   |
| 66. | <p>¿Trabajo en la agricultura durante este embarazo?</p> <p>1 – SI, EN UNA NURSERIA</p> <p>2 – SI, CON LA HOJITA</p> <p>3 – SI, EN AMBOS: NURSERIA Y LA HOJITA</p> <p>4 – SI, EN OTRO TRABAJO AGRICOLA</p> <p>5 – NO, NO TRABAJE EN LA AGRICULTURA</p> <p>77 – SE NIEGA A CONTESTAR</p> <p>99 – NO SABE</p>                                                                                                               | <p>—</p> <p>66B. Si 4, pregunte ¿que tipo de trabajo?</p> <p>_____</p> <p>_____</p> | <p>—</p> <p>66B. Si 4, pregunte ¿que tipo de trabajo?</p> <p>_____</p> <p>_____</p> | <p>—</p> <p>66B. Si 4, pregunte ¿que tipo de trabajo?</p> <p>_____</p> <p>_____</p> | <p>—</p> <p>66B. Si 4, pregunte ¿que tipo de trabajo?</p> <p>_____</p> <p>_____</p> | <p>—</p> <p>66B. Si 4, pregunte ¿que tipo de trabajo?</p> <p>_____</p> <p>_____</p> |
| 67. | <p>¿Recibió cuidado prenatal durante este embarazo?</p> <p>1 – SI</p> <p>2 – NO (<b>PASE A LA PREGUNTA 70</b>)</p> <p>77 – SE NIEGA A CONTESTAR</p> <p>99 – NO SABE</p>                                                                                                                                                                                                                                                   | —                                                                                   | —                                                                                   | —                                                                                   | —                                                                                   | —                                                                                   |

|      | EMBARAZO                                                                                                                                                                                                                                                                                                         | 2 <sup>nd</sup> más reciente                                                                                                                                   | 3 <sup>rd</sup> más reciente                                                                                                                                   | 4 <sup>th</sup> más reciente                                                                                                                                   | 5 <sup>th</sup> más reciente                                                                                                                                   | 6 <sup>th</sup> más reciente                                                                                                                                  |
|------|------------------------------------------------------------------------------------------------------------------------------------------------------------------------------------------------------------------------------------------------------------------------------------------------------------------|----------------------------------------------------------------------------------------------------------------------------------------------------------------|----------------------------------------------------------------------------------------------------------------------------------------------------------------|----------------------------------------------------------------------------------------------------------------------------------------------------------------|----------------------------------------------------------------------------------------------------------------------------------------------------------------|---------------------------------------------------------------------------------------------------------------------------------------------------------------|
| 68.  | Durante el embarazo ¿se le diagnosticó con<br><b>[PREGUNTE POR CADA DIAGNOSTICO]?</b><br>1 – SI<br>2 – NO<br>77 – SE NIEGA A CONTESTAR<br>99 – NO SABE                                                                                                                                                           |                                                                                                                                                                |                                                                                                                                                                |                                                                                                                                                                |                                                                                                                                                                |                                                                                                                                                               |
| 69A. | Alta presión arterial, pre eclampsia, toxemia, o eclampsia?                                                                                                                                                                                                                                                      | ---                                                                                                                                                            | ---                                                                                                                                                            | ---                                                                                                                                                            | ---                                                                                                                                                            | ---                                                                                                                                                           |
| 69B. | Diabetes o alto nivel de azúcar en la sangre?                                                                                                                                                                                                                                                                    | ---                                                                                                                                                            | ---                                                                                                                                                            | ---                                                                                                                                                            | ---                                                                                                                                                            | ---                                                                                                                                                           |
| 69C. | Parto premature o contracciones prematuras?                                                                                                                                                                                                                                                                      | ---                                                                                                                                                            | ---                                                                                                                                                            | ---                                                                                                                                                            | ---                                                                                                                                                            | ---                                                                                                                                                           |
| 70.  | ¿En algún momento desde su nacimiento hasta el primer año de vida, el medico le dijo que el bebe tenía algún defecto de nacimiento o alguna otra enfermedad?<br>1 – SI <b>[Pregunte si fue mas de una enfermedad o defecto, y si fue causa de muerte]</b><br>2 – NO<br>77 – SE NIEGA A CONTESTAR<br>99 – NO SABE | ---<br>Si contesta afirmativamente, por favor especifique:<br><b>Si fue causa de muerte marque (D)</b><br>70B. _____<br>70C. _____<br>70D. _____<br>70E. _____ | ---<br>Si contesta afirmativamente, por favor especifique:<br><b>Si fue causa de muerte marque (D)</b><br>70B. _____<br>70C. _____<br>70D. _____<br>70E. _____ | ---<br>Si contesta afirmativamente, por favor especifique:<br><b>Si fue causa de muerte marque (D)</b><br>70B. _____<br>70C. _____<br>70D. _____<br>70E. _____ | ---<br>Si contesta afirmativamente, por favor especifique:<br><b>Si fue causa de muerte marque (D)</b><br>70B. _____<br>70C. _____<br>70D. _____<br>70E. _____ | ---<br>Si contesta afirmativamente, por favor especifique:<br><b>If cause of death indicate - (D)</b><br>70B. _____<br>70C. _____<br>70D. _____<br>70E. _____ |
| 71.  | ¿Qué peso tenia el/la niño(a) cuando nació?<br><b>[SI NO SABE PREGUNTE SI FUERON MENOS DE 2 KILOS Y MEDIO -2500 GRAMOS o DE 5 LBS 8 OZ O]</b><br><b>9994:</b> < 5 lbs, 8 oz o 2500 gramos<br><b>9995:</b> > 5 lbs, 8oz o 2500 gramos                                                                             | __ lbs __ oz<br>Or<br>_____ kg<br>MARQUE si 'NO SABE':                                                                                                         | __ lbs __ oz<br>Or<br>_____ kg                                                                                                                                 | __ lbs __ oz<br>Or<br>_____ kg                                                                                                                                 | __ lbs __ oz<br>Or<br>_____ kg                                                                                                                                 | __ lbs __ oz<br>Or<br>_____ kg                                                                                                                                |

GRACIAS POR SU PARTICIPACION
